# Supplementary material for: Green synthesis of surfactant-free mesoporous silica with strong hydrophilicity via metal salt modifications for moisture adsorption
Source: Royal Society of Chemistry journal article supplement (doi:10.1039/d3re00513e), 2024-01-01
Supplement: d3re00513e1.pdf [file d3re00513e1.pdf]

**Green Synthesis of Surfactant-free Mesoporous Silica with Strong Hydrophilicity  
via Metal Salt Modifications for Moisture Adsorption  
Super-hydrophilic Surfactant-free Mesoporous Silica**

Pariyawalee Sangteantong<sup>1,2</sup>, Kunpirom Chainarong<sup>1</sup>, Waleeporn Donphai<sup>1,2</sup>, and Metta  
Chareonpanich<sup>1,2,\*</sup>

<sup>1</sup> KU-Green Catalysts Group, Department of Chemical Engineering, Faculty of  
Engineering, Kasetsart University, Bangkok 10900, Thailand

<sup>2</sup> Center for Advanced Studies in Nanotechnology for Chemical, Food and Agricultural  
Industries, KU Institute for Advanced Studies, Kasetsart University, Bangkok 10900,  
Thailand

**Supplementary data**

**Table S1** Percentage of hydrophilic functional groups (Si-O- and Si-OH) of metal salt-  
modified mesoporous silica.

**Figure S1:** TEM images of (a) MPS and NaCl-modified MPS products: (b)  
MPS\_0.125NaCl, (c) MPS\_0.250NaCl, (d) MPS\_0.375NaCl, and (e) MPS\_0.500NaCl.

**Figure S2:** TEM images of (a) MPS and MgCl<sub>2</sub>-modified MPS products: (b)  
MPS\_0.125MgCl<sub>2</sub>, (c) MPS\_0.250MgCl<sub>2</sub>, (d) MPS\_0.375MgCl<sub>2</sub>, and (e)  
MPS\_0.500MgCl<sub>2</sub>.

**Figure S3:** FTIR spectra of (a) silica gel, (b) MPS and MPS modified by (A) NaCl, (B)  
KCl, (C) MgCl<sub>2</sub>, and (D) CaCl<sub>2</sub> salts with concentrations of 0.125 (c, g, k, o); 0.250 (d,  
h, l, p); 0.375 (e, i, m, q); and 0.500 (f, j, n, r) g salt/g SiO<sub>2</sub>.

**Figure S4:** DTG curves of silica gel, MPS and MPS modified by (A) NaCl, (B) KCl, (C)  
MgCl<sub>2</sub>, and (D) CaCl<sub>2</sub> salts.

**Table S1** Percentage of hydrophilic functional groups (Si-O- and Si-OH) of metal salt-modified mesoporous silica.

| Adsorbents                 | Percentage of hydrophilic functional group <sup>a</sup> (%) |       |
|----------------------------|-------------------------------------------------------------|-------|
|                            | Si-O-                                                       | Si-OH |
| Silica gel                 | 4.91                                                        | 2.86  |
| MPS                        | 4.48                                                        | 2.75  |
| MPS_0.125NaCl              | 4.66                                                        | 2.50  |
| MPS_0.250NaCl              | 4.85                                                        | 2.60  |
| MPS_0.375NaCl              | 5.09                                                        | 2.70  |
| MPS_0.500NaCl              | 5.47                                                        | 3.04  |
| MPS_0.125KCl               | 4.28                                                        | 2.65  |
| MPS_0.250KCl               | 4.62                                                        | 2.82  |
| MPS_0.375KCl               | 4.67                                                        | 2.83  |
| MPS_0.500KCl               | 4.93                                                        | 2.95  |
| MPS_0.125MgCl <sub>2</sub> | 4.66                                                        | 2.50  |
| MPS_0.250MgCl <sub>2</sub> | 3.49                                                        | 2.18  |
| MPS_0.375MgCl <sub>2</sub> | 3.03                                                        | 1.83  |
| MPS_0.500MgCl <sub>2</sub> | 2.30                                                        | 1.40  |
| MPS_0.125CaCl <sub>2</sub> | 1.27                                                        | 0.84  |
| MPS_0.250CaCl <sub>2</sub> | 1.22                                                        | 0.84  |
| MPS_0.375CaCl <sub>2</sub> | 1.18                                                        | 0.78  |
| MPS_0.500CaCl <sub>2</sub> | 1.12                                                        | 0.75  |

<sup>a</sup> Calculated by using area from deconvolution of FTIR spectra.

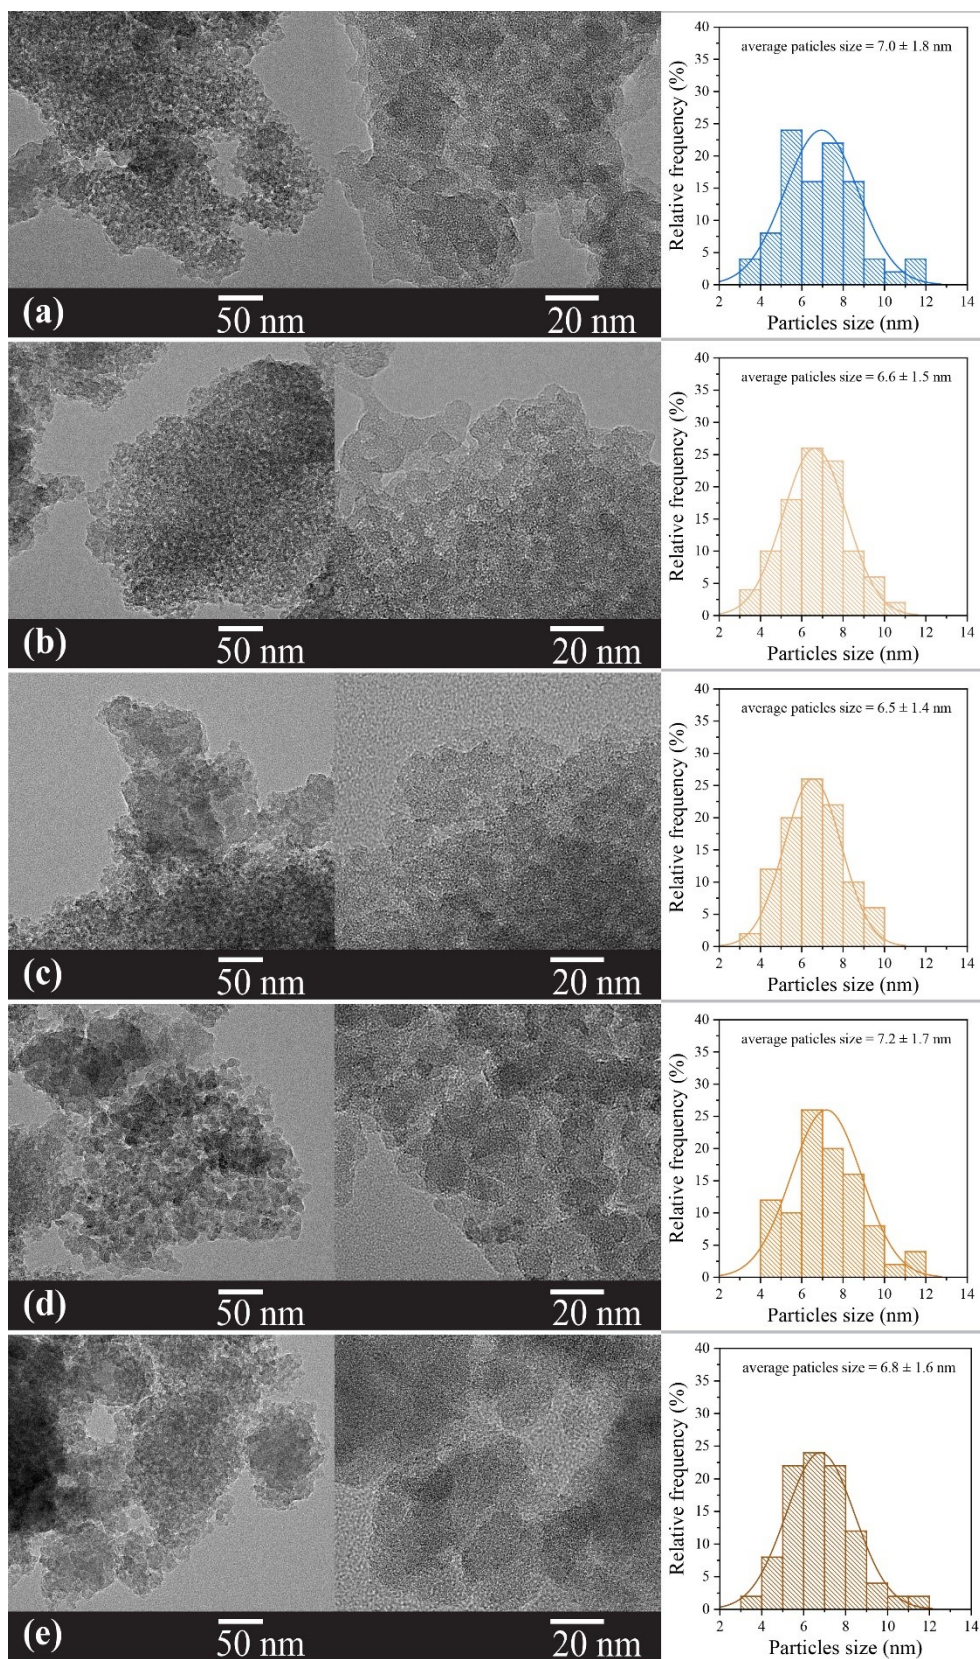

**Figure S1:** TEM images and particle size distributions of (a) MPS and NaCl-modified MPS products: (b) MPS\_0.125NaCl, (c) MPS\_0.250NaCl, (d) MPS\_0.375NaCl, and (e) MPS\_0.500NaCl.

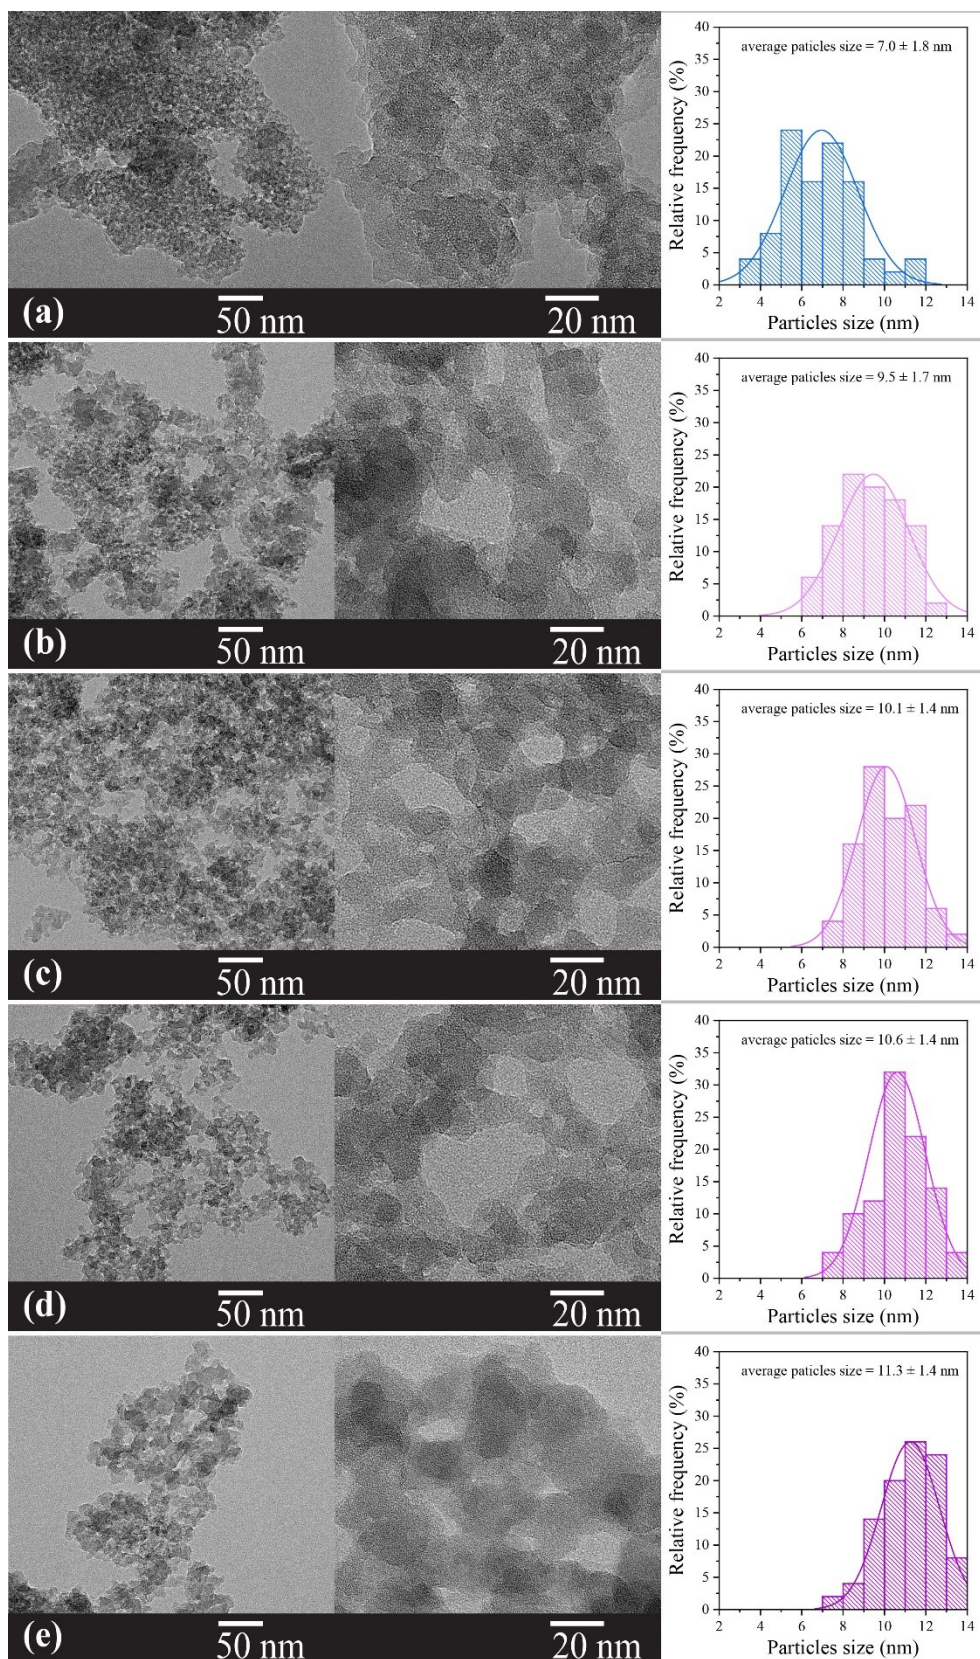

**Figure S2:** TEM images and particle size distributions of (a) MPS and  $\text{MgCl}_2$ -modified MPS products: (b)  $\text{MPS}_{0.125}\text{MgCl}_2$ , (c)  $\text{MPS}_{0.250}\text{MgCl}_2$ , (d)  $\text{MPS}_{0.375}\text{MgCl}_2$ , and (e)  $\text{MPS}_{0.500}\text{MgCl}_2$ .

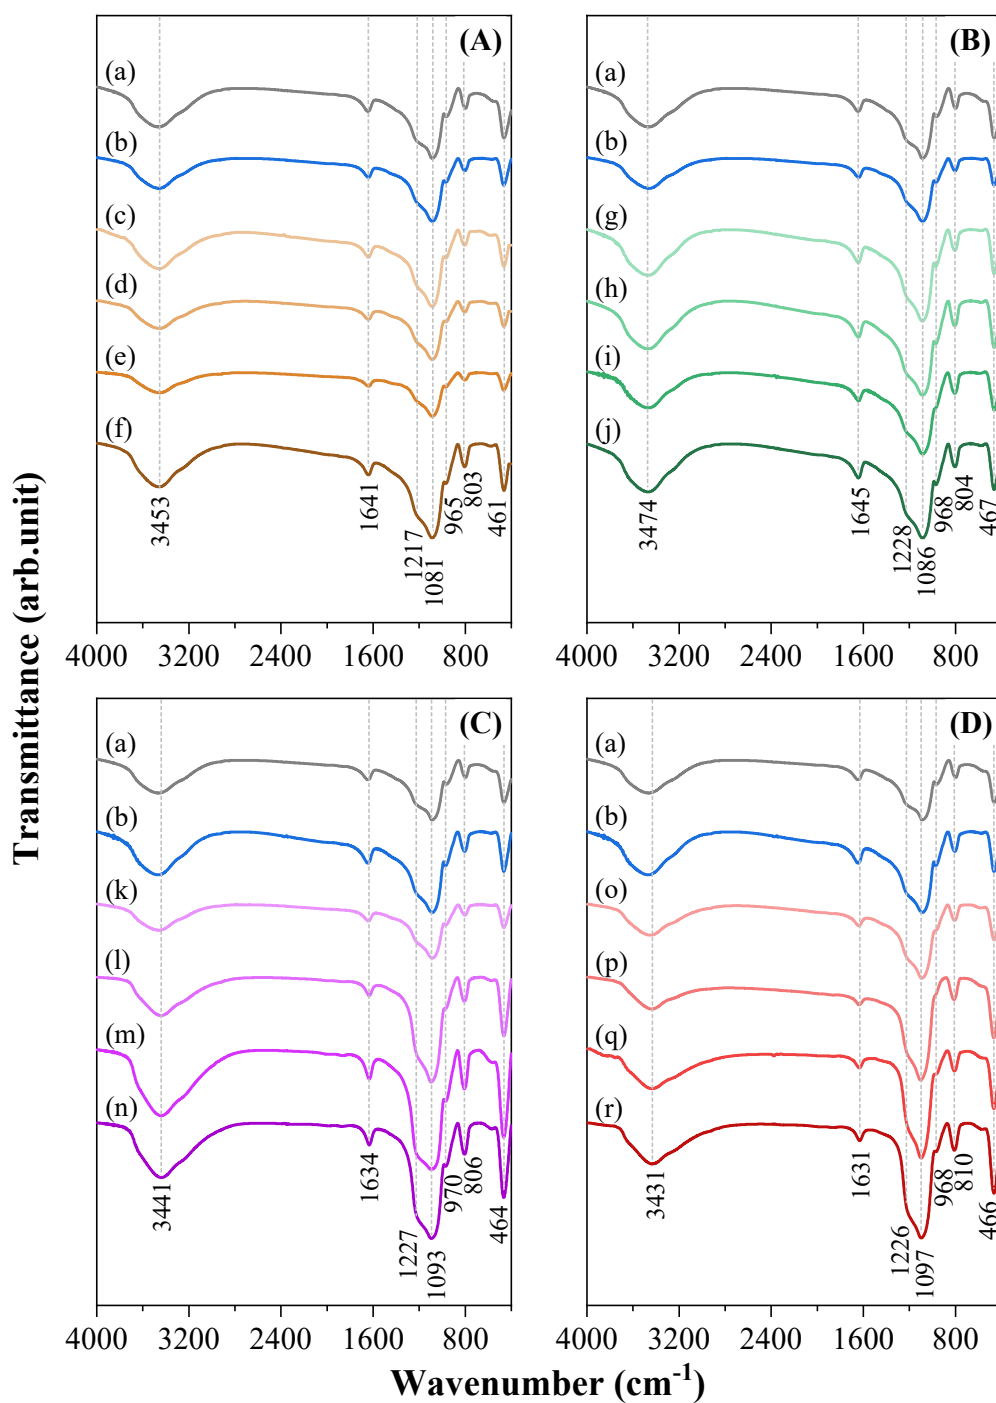

**Figure S3:** FTIR spectra of (a) silica gel, (b) MPS and MPS modified by (A) NaCl, (B) KCl, (C)  $\text{MgCl}_2$ , and (D)  $\text{CaCl}_2$  salts with concentrations of 0.125 (c, g, k, o); 0.250 (d, h, l, p); 0.375 (e, i, m, q); and 0.500 (f, j, n, r) g salt/g  $\text{SiO}_2$ .

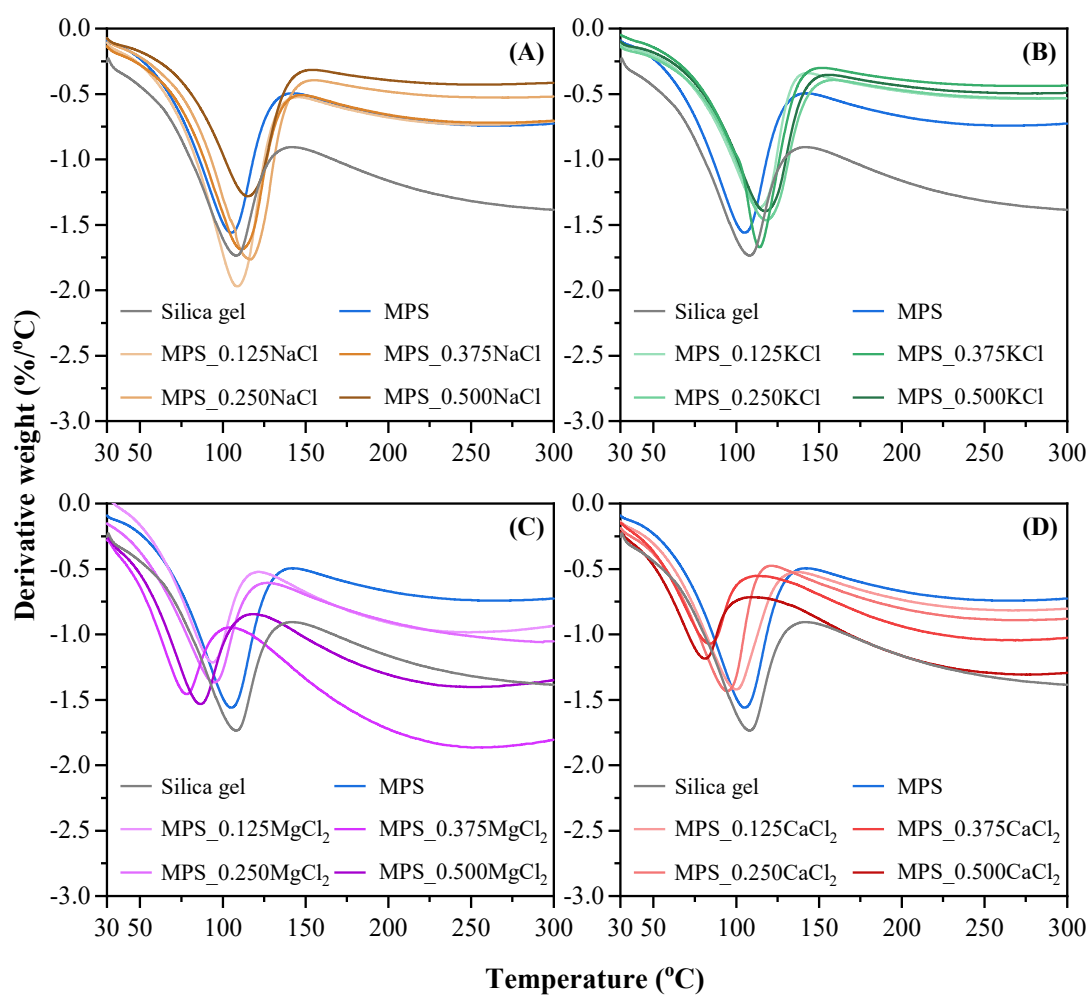

**Fi**

**Figure S4:** DTG curves of silica gel, MPS and MPS modified by (A) NaCl, (B) KCl, (C) MgCl<sub>2</sub>, and (D) CaCl<sub>2</sub> salts.
